# Supplementary material for: Enhanced device performance and stability of perovskite solar cells with low-temperature ZnO/TiO2 bilayered electron transport layers
Source: Royal Society of Chemistry journal article supplement (doi:10.1039/c8ra03162b), 2018-01-01
Supplement: c8ra03162b1.pdf [file c8ra03162b1.pdf]

## Supporting Information

### Enhanced device performance and stability of perovskite solar cells with low-temperature ZnO/TiO<sub>2</sub> bilayered electron transport layers

Caifeng Zhang,<sup>a,b</sup> Guangmei Zhai,<sup>\*a,b</sup> Yong Zhang,<sup>a,b,c</sup> Wenhui Gao,<sup>a,b</sup> Zhimeng Shao,<sup>a,b</sup> Lulu Zheng,<sup>a,b</sup>

Fuhong Mei,<sup>a,b</sup> Hua Zhang,<sup>\*a,b</sup> Yongzhen Yang,<sup>a,b</sup> Xuemin Li,<sup>a,b</sup> Xuguang Liu,<sup>a,b,c</sup> and Bingshe Xu<sup>a,b</sup>

*a. Key Laboratory of Interface Science and Engineering in Advanced Materials of Ministry of*

*Education, Research Centre of Advanced Materials Science and Technology, Taiyuan University of*

*Technology, Taiyuan, Shanxi 030024, China.*

*E-mail: zhaiguangmei@tyut.edu.cn (G. Zhai); zhanghua01@tyut.edu.cn (H. Zhang)*

*b. CAS Key Laboratory of Renewable Energy, Guangzhou 510640, China*

*c. Collaborative Innovation Centre for Advanced Thin-film Optoelectronic Materials and Devices in*

*Shanxi Province, Taiyuan, Shanxi 030024, China*

*d. College of Materials Science and Engineering, Taiyuan University of Technology, Taiyuan, Shanxi*

*030024, China*

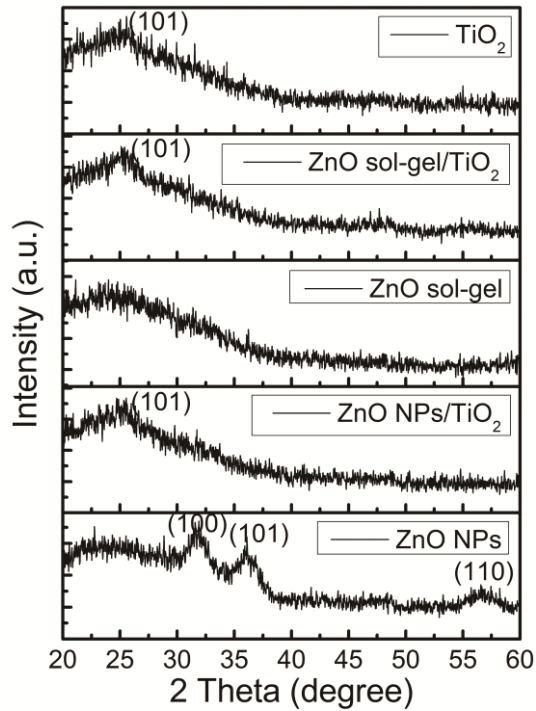

Fig. S1 Grazing Incidence X-ray diffraction (GIXRD) patterns of different electron transport layers deposited on glass.

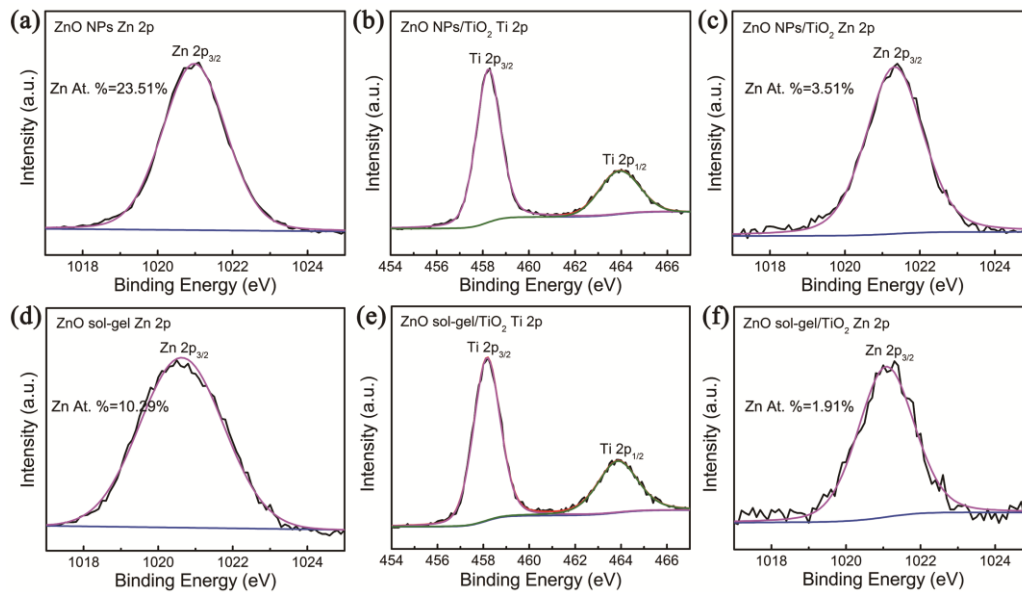

Fig. S2 Zn 2p and Ti 2p XPS spectra of (a) a ZnO NP-film, (b)(c) a ZnO NPs/TiO<sub>2</sub> bilayered film, (d) a ZnO sol-gel film, and (e) (f) a ZnO sol-gel/TiO<sub>2</sub> bilayered film. (Note: a small amount of Zn can be still detected on the surface of the ZnO/TiO<sub>2</sub> bilayer, indicating that TiO<sub>2</sub> does not completely cover the ZnO films probably due to the rough surface of FTO.)

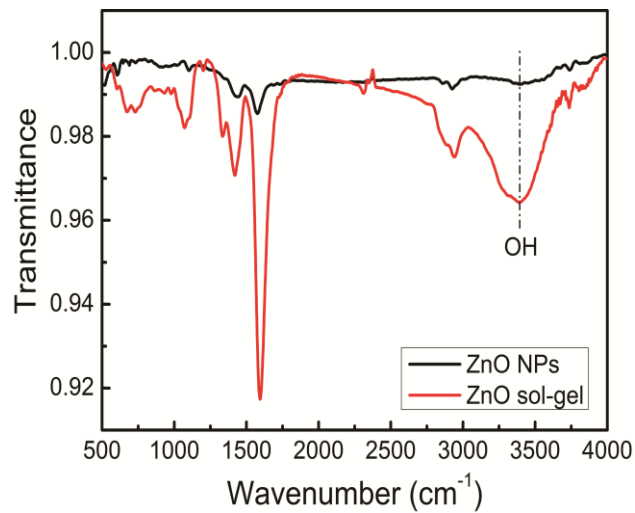

Fig. S3 FTIR spectra of a ZnO NP-film and a ZnO sol-gel film.

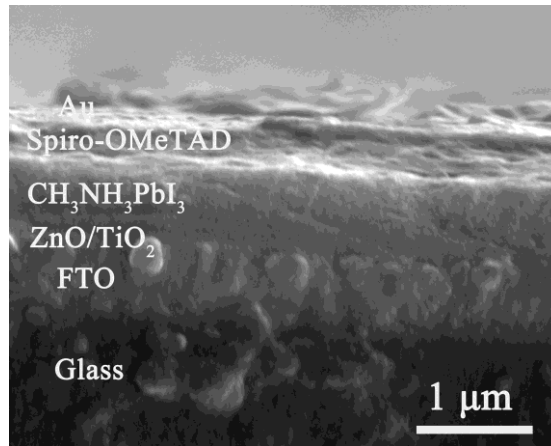

Fig. S4 The cross-sectional SEM image of a PSC device with the structure of glass/FTO/ ZnO/TiO<sub>2</sub> /CH<sub>3</sub>NH<sub>3</sub>PbI<sub>3</sub>/Spiro-OMeTAD/Au.

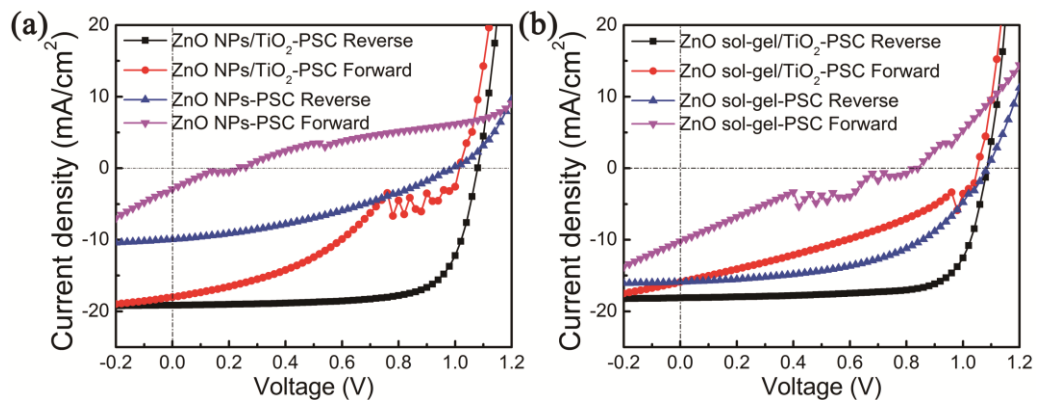

Fig. S5 J-V curves of perovskite solar cells fabricated (a) on a ZnO NP-film and a ZnO NPs/TiO<sub>2</sub> bilayered film; (b) on a ZnO sol-gel film and a ZnO sol-gel/TiO<sub>2</sub> bilayered film under reverse and forward scans.

Table S1 Photovoltaic parameters of different devices under reverse and forward scans.

|                                           | $V_{oc}$ (V) | $J_{sc}$ (mA/cm <sup>2</sup> ) | FF (%) | PCE (%) |
|-------------------------------------------|--------------|--------------------------------|--------|---------|
| ZnO NPs-PSC Reverse                       | 0.98         | 9.94                           | 36.50  | 3.56    |
| ZnO NPs-PSC Forward                       | 0.22         | 2.91                           | 17.84  | 0.11    |
| ZnO NPs/TiO <sub>2</sub> -PSC Reverse     | 1.06         | 19.14                          | 73.89  | 15.0    |
| ZnO NPs/TiO <sub>2</sub> -PSC Forward     | 1.00         | 18.01                          | 34.65  | 6.24    |
| ZnO sol-gel-PSC Reverse                   | 1.08         | 15.90                          | 52.58  | 9.03    |
| ZnO sol-gel-PSC Forward                   | 0.84         | 10.23                          | 27.73  | 2.38    |
| ZnO sol-gel/TiO <sub>2</sub> -PSC Reverse | 1.08         | 18.11                          | 74.38  | 14.55   |
| ZnO sol-gel/TiO <sub>2</sub> -PSC Forward | 1.04         | 15.91                          | 36.29  | 6.01    |

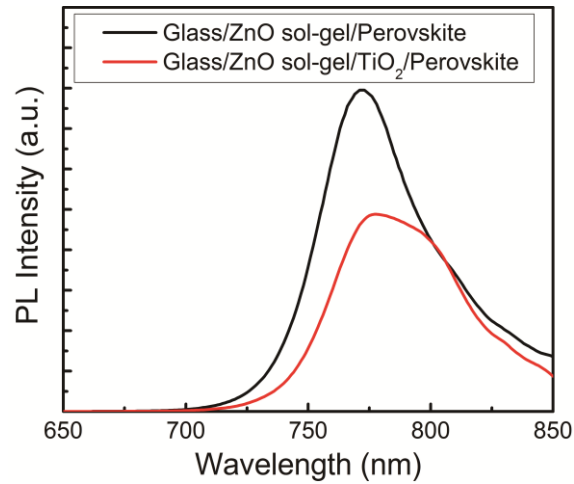

Fig. S6 The steady-state photoluminescence spectra of perovskite films deposited on a ZnO sol-gel film and a ZnO sol-gel/TiO<sub>2</sub> bilayer film.

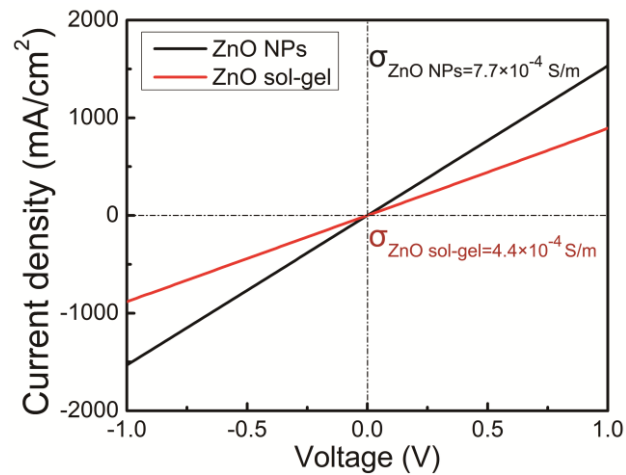

Fig. S7 J-V curves of the ZnO-NP and ZnO sol-gel films with the device structure of ITO/ZnO/Au in dark.

**Conductivity measurement:** In order to obtain electrical conductivities of the ZnO NP-film and ZnO sol-gel film, we measured  $J$ - $V$  curves of devices with the structure of ITO/ZnO/Au. The obtained  $J$ - $V$  curves are shown in Fig. S7 in the supporting information. Their conductivities were further calculated out via the following formula.

$$\sigma = \frac{l}{RS}$$

where  $\sigma$  is conductivity (S/m),  $l$  film thickness (m),  $R$  film resistance ( $\Omega$ ), and  $S$  film area ( $m^2$ ).

The calculated conductivities of the ZnO NP-film and ZnO sol-gel film are  $7.7 \times 10^{-4}$  S/m and  $4.4 \times 10^{-4}$  S/m, respectively.

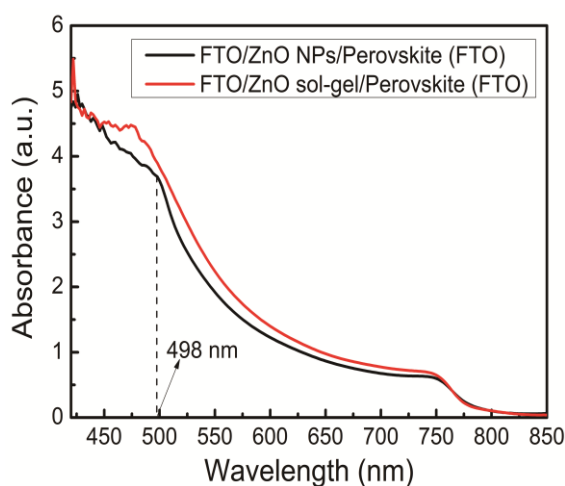

Fig. S8 Absorbance spectra of perovskite films deposited on a ZnO NP-film and a ZnO sol-gel film.

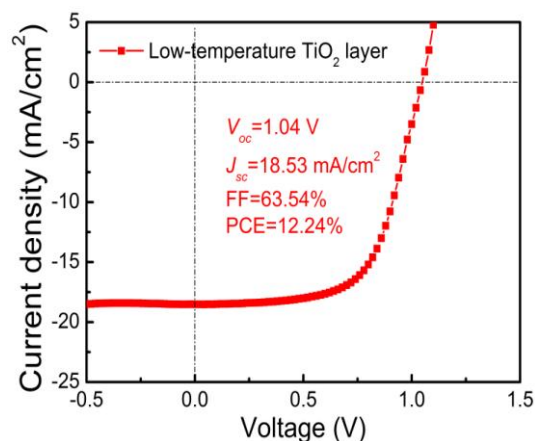

Fig. S9 Typical  $J$ - $V$  curve of the perovskite solar cell based on a low-temperature  $TiO_2$  electron transport layer.
